# Supplementary material
Source: PubMed Central journal article supplement (PMC2646407)
Supplement: NIHMS73723-supplement-supplementary.pdf [file NIHMS73723-supplement-supplementary.pdf]

## Supplemental Data

### The Plasminogen Fibrinolytic Pathway

### Is Required for Hematopoietic Regeneration

Beate Heissig, Leif R. Lund, Haruyo Akiyama, Makiko Ohki, Yohei Morita, John Rømer, Hiromitsu Nakauchi, Ko Okumura, Hideoki Ogawa, Zena Werb, Keld Danø, and Koichi Hattori

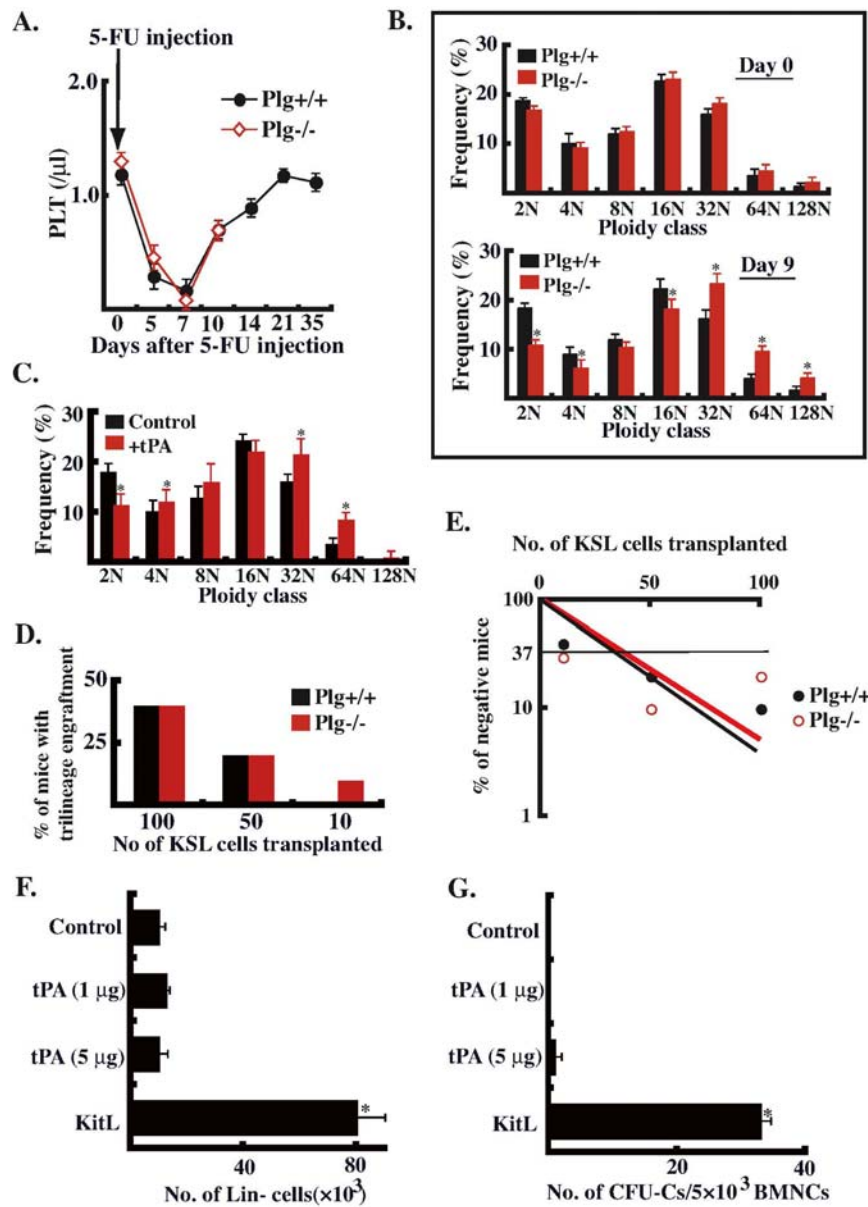

**Figure S1.** (A-B) Impaired megakaryopoiesis after myelosuppression in plasminogen (Plg) deficient mice. Plg<sup>+/+</sup> (n=12) and Plg<sup>-/-</sup> mice (n=12) received a single dose of the myelosuppressive agent 5-FU i.v. (A) Platelets were counted using a Neubauer chamber. (B) BM cells were stained with propidium iodide (PI) and analyzed for cell ploidy by FACS. (C) BMMCs of tPA and non-tPA treated animals were stained with PI and analyzed for cell ploidy by FACS as indicated. (D-E) Functionally normal HSCs in Plg deficient mice. Lethally irradiated Ly-5.1 mice were injected with 10, 50 or 100 KSL (c-Kit<sup>+</sup>/Sca-1<sup>+</sup>/lin<sup>-</sup>) cells (10 recipient mice per cell concentration) from Plg<sup>+/+</sup> and Plg<sup>-/-</sup> mice together with CD45.1 normal BM competitor cells. (D) After 7 month, the percentage of mice surviving and showing >5% CD45.2 cells in PB by FACS was determined. (E) Identical competitive repopulating units (at 37% of negative mice) for Plg<sup>+/+</sup> and Plg<sup>-/-</sup> KSL cells. (F-G) tPA-mediated cell and progenitor proliferation does not occur in the absence of a stromal feeder layer. Lin<sup>-</sup> cells from Plg<sup>+/+</sup> mice were cultured in the presence/absence of tPA with/without KitL in a suspension culture. After 4 days cells were harvested, (F) counted and (G) subjected into a progenitor assay (n=3). Error bars represent SEM.
